# Supplementary material
Source: publisher site journal article supplement (https://www.dovepress.com/article/494321)
Supplement: Supplementary file 1 [file get_supplementary_file.php]

**
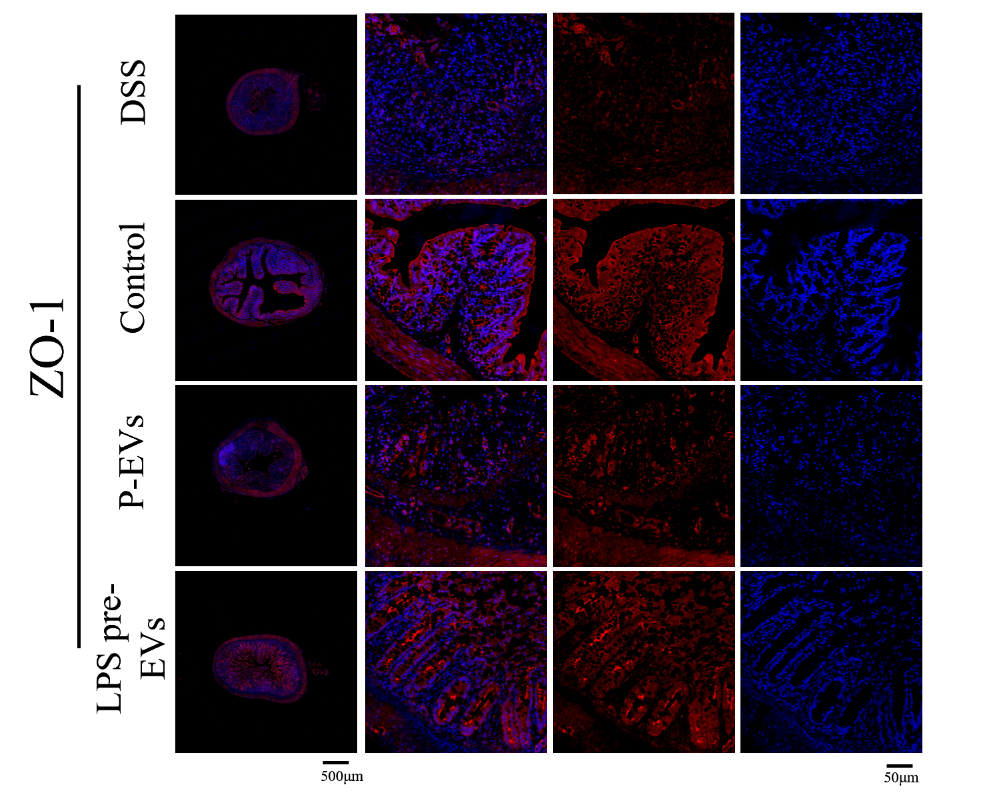
**

**Supplementary Figure 1. Effects of LPS pre-EVs on the tight junction protein ZO-1 in the intestinal epithelium of DSS-induced colitis mice.**

Immunofluorescence staining showed the expression of the tight junction protein ZO-1 in the intestinal epithelium of mice from different treatment groups. ZO-1 was shown in red, and nuclei were stained with DAPI in blue. Compared to the DSS group, the LPS pre-EVs group exhibited significantly enhanced ZO-1 expression, indicating a protective effect on intestinal barrier function. Scale bars: 500 μm on the leftmost images, 50 μm on other images.


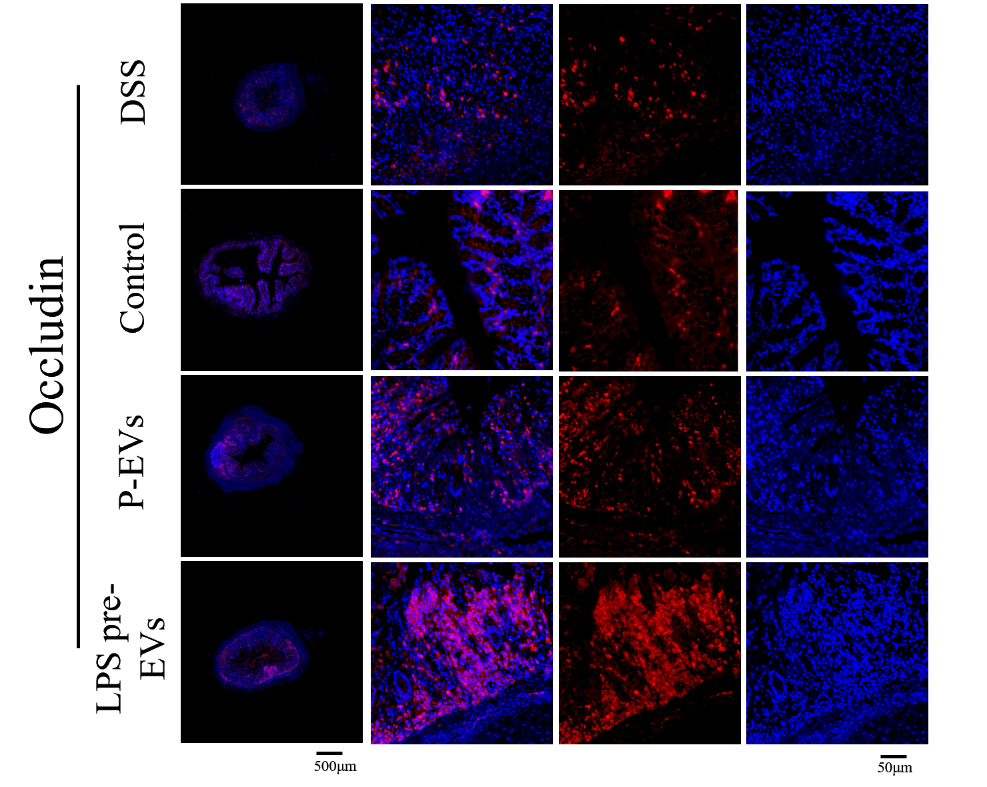


**Supplementary Figure 2. Effects of LPS pre-EVs on the tight junction protein Occludin in the intestinal epithelium of DSS-induced colitis mice.**

Immunofluorescence staining showed the expression of the tight junction protein Occludin in the intestinal epithelium of mice from different treatment groups. Occludin was shown in red, and nuclei were stained with DAPI in blue. The LPS pre-EVs group exhibited significantly enhanced Occludin expression, indicating a protective effect on intestinal barrier integrity. Scale bars: 500 μm on the leftmost images, 50 μm on other images.


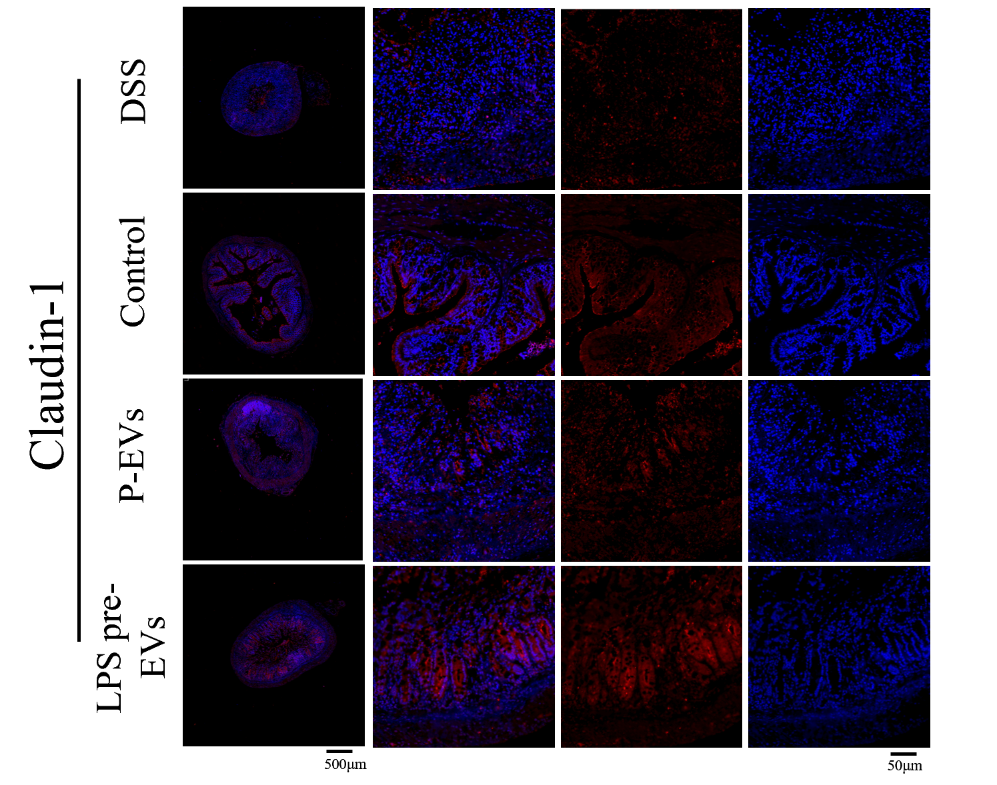


**Supplementary Figure 3. Effects of LPS pre-EVs on the tight junction protein Claudin-1 in the intestinal epithelium of DSS-induced colitis mice.**

Immunofluorescence staining showed the expression of the tight junction protein Claudin-1 in the intestinal epithelium of mice from different treatment groups. Claudin-1 was shown in red, and nuclei were stained with DAPI in blue. The LPS pre-EVs group demonstrated enhanced Claudin-1 expression, suggesting a protective effect on the intestinal barrier. Scale bars: 500 μm on the leftmost images, 50 μm on other images.


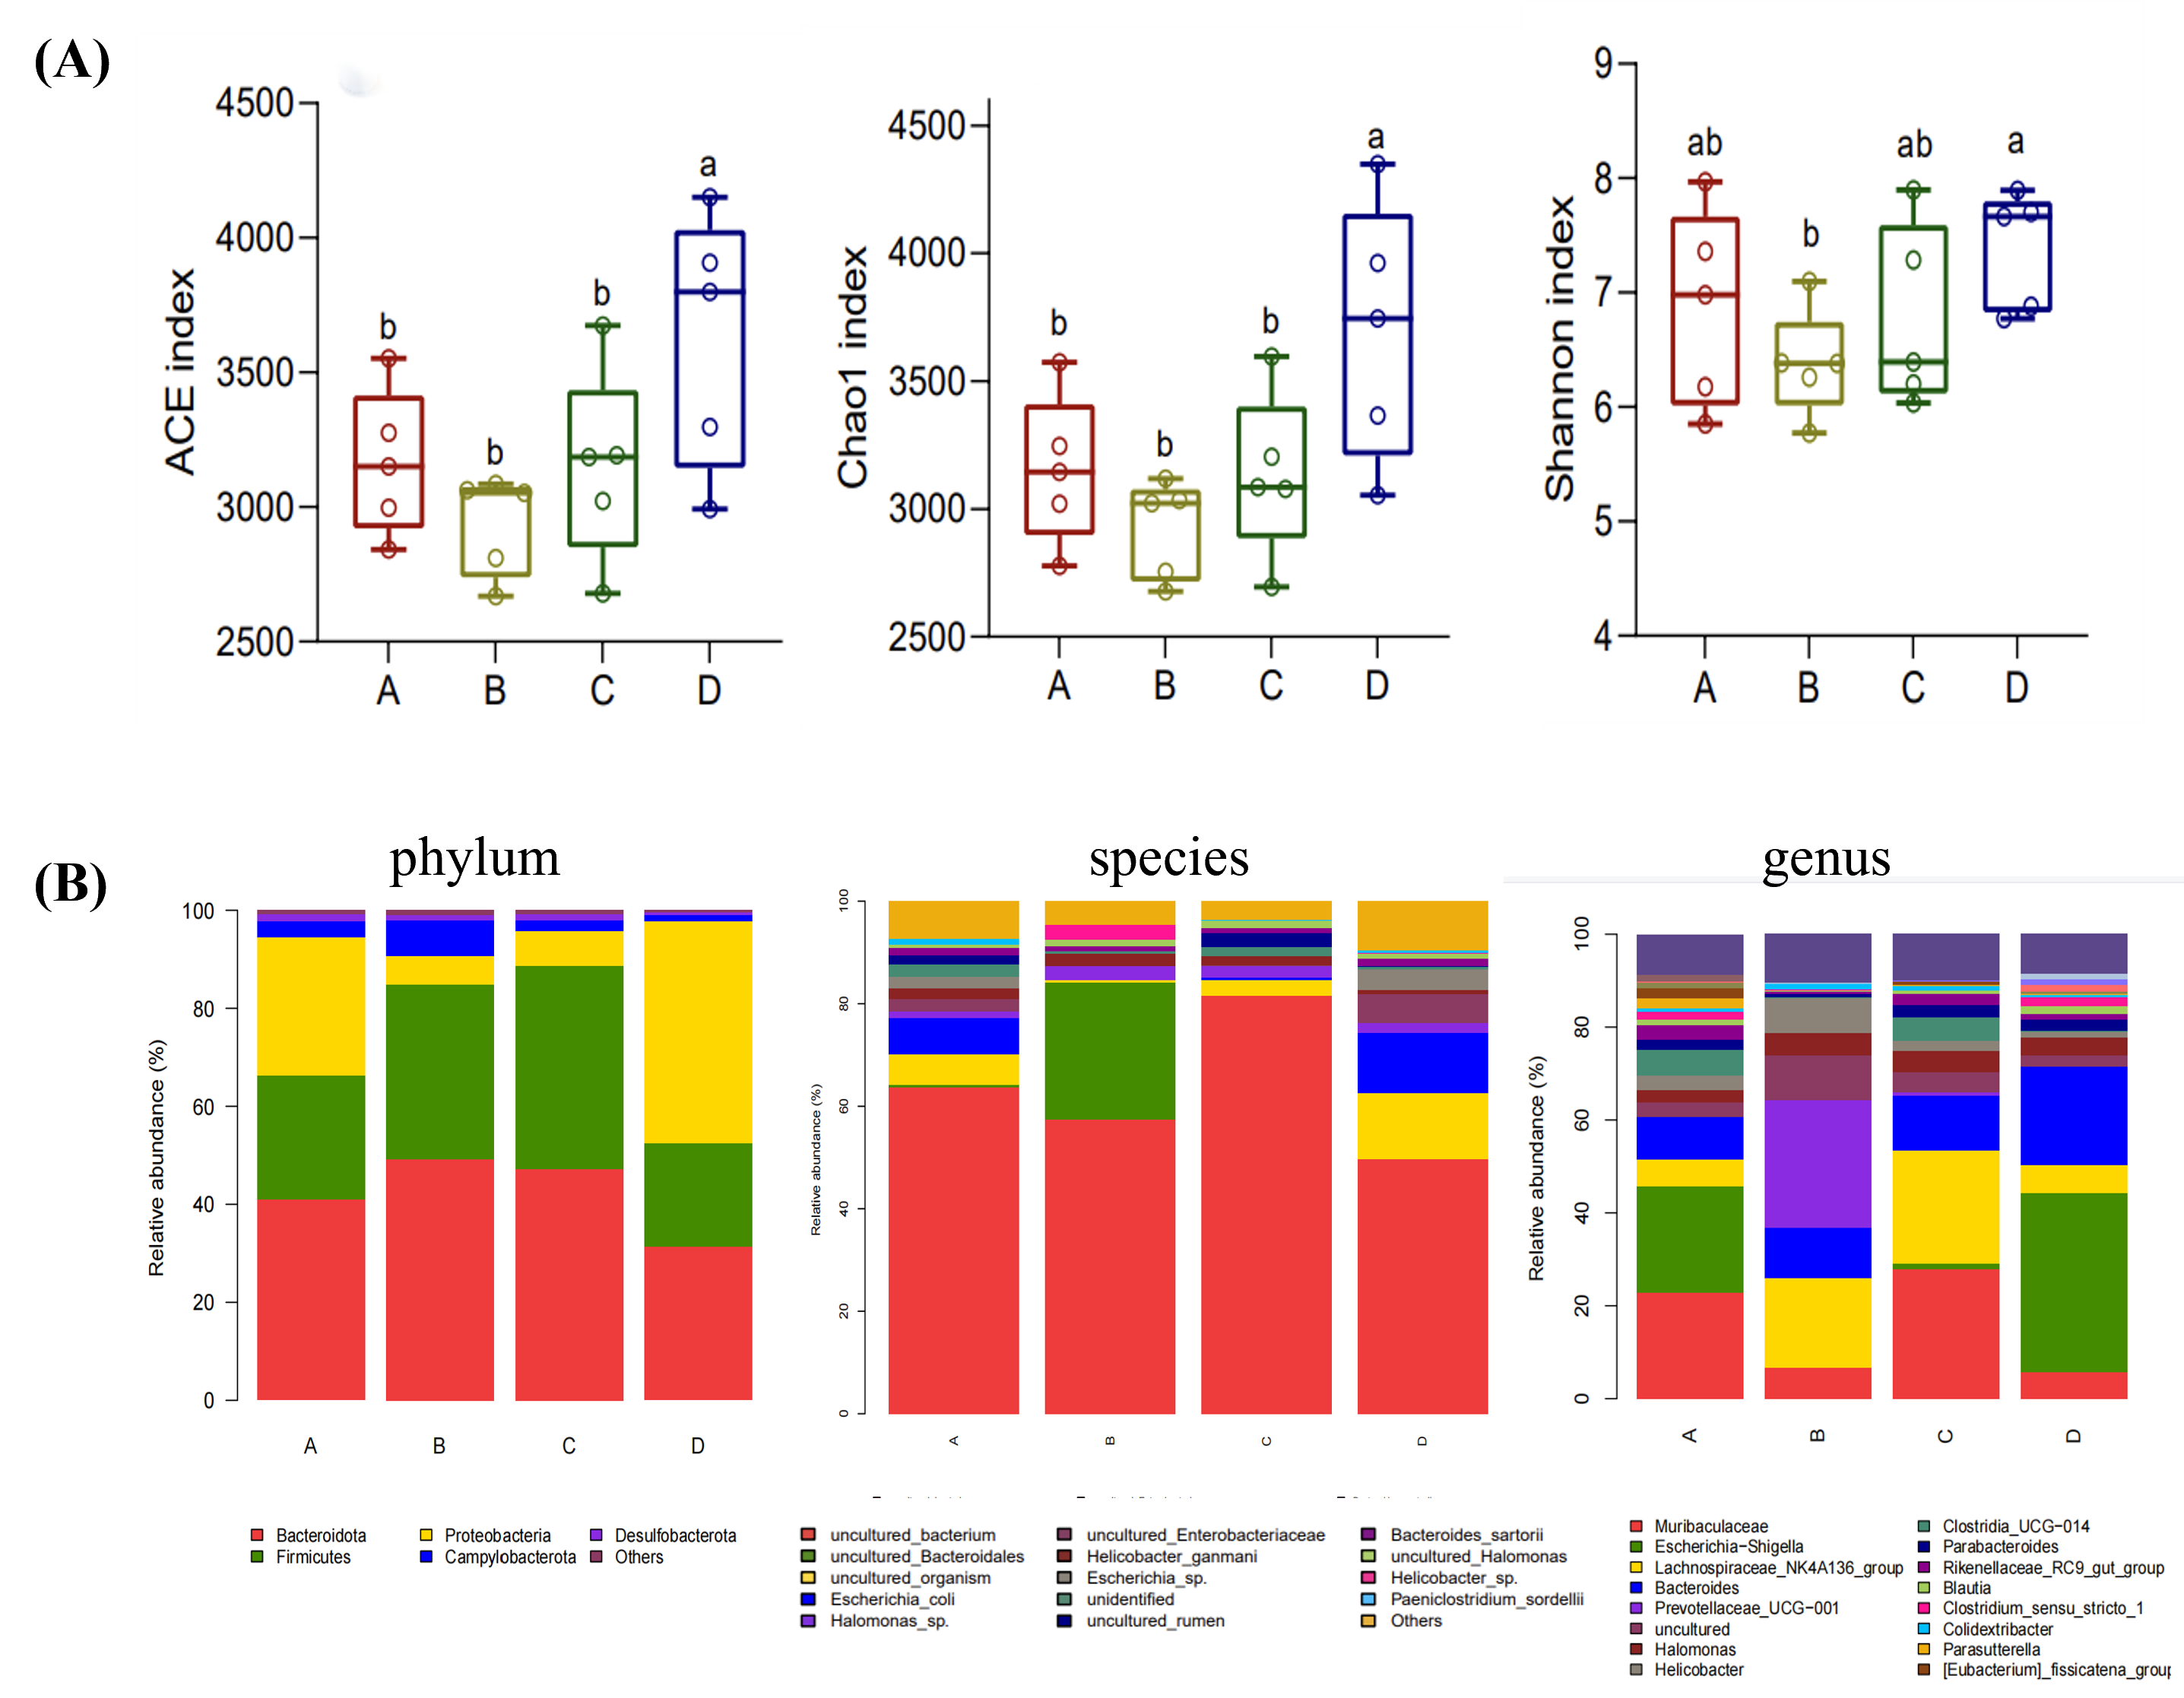


**Supplementary Figure 4. Gut Microbiota α-Diversity Analysis**

1. **α-Diversity Indices.** ACE, Chao1, and Shannon indices, which are commonly used to evaluate the richness and diversity of microbial communities in each group (A, B, C, D), are shown. The results demonstrated that the P-EVs group (Group C) and the LPS pre-EVs group (Group D) have higher diversity indices compared to the DSS group (Group A), particularly in the Chao1 and ACE indices, suggesting that both P-EVs and LPS pre-EVs may partially restore gut microbial diversity. The letters (a, b) represent significant differences between groups, groups with the same letter do not show significant differences, whereas groups with different letters exhibit significant differences (*P* < 0.05).
2. **Relative Abundance at Different Taxonomic Levels.** This panel shows the relative abundance distributions at the phylum, species, and genus levels for each group. Compared to the DSS group (Group A) and the Control group (Group B), the P-EVs group (Group C) displays significantly different microbial compositions at various taxonomic levels. At the genus level, in particular, the abundance of *Clostridia_UCG-014* increased, while the abundances of *Streptococcus* and *Shigella* decreased, indicating that P-EVs promote the growth of beneficial bacteria and inhibit pathogenic bacteria.


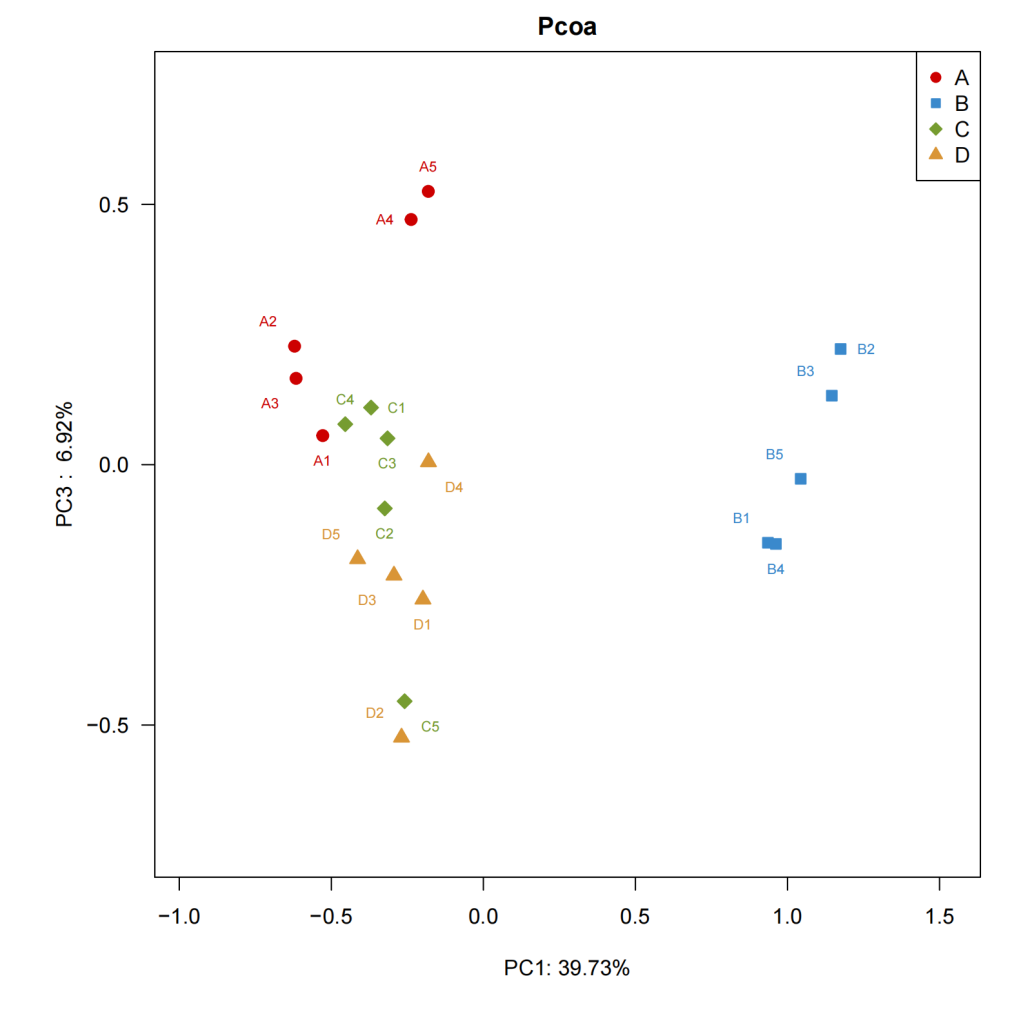


**Supplementary Figure 5. Gut Microbiota PCoA Analysis**

This figure presents the results of principal coordinate analysis (PCoA), reflecting the overall differences in gut microbial community structures among the groups (A, B, C, D). PC1 and PC3 explain 39.73% and 6.92% of the variation in community structure, respectively. The P-EVs group (Group C) is clearly separated from the DSS group (Group A) on the PCoA plot, indicating that P-EVs significantly altered the overall structure of the gut microbiome. Additionally, the LPS pre-EVs group (Group D) also exhibits distinct clustering from other groups, suggesting substantial changes in its microbial community structure.
